# Supplementary material for: Genome Wide Identification and Annotation of NGATHA Transcription Factor Family in Crop Plants
Source: MDPI journal article supplement (doi:10.3390/ijms23137063), 2022-06-25
Supplement: s1 [file s1]

**Table S1.** List of 207 identified NGATHA genes and related IDs used for phylogeny analysis.

| <b>S.No.</b> | <b>Organism</b>                | <b>Gene ID</b>  | <b>Gene name</b> |
|--------------|--------------------------------|-----------------|------------------|
| 1.           | <i>Arabidopsis thaliana</i>    | AT2G46870       | AtNGA1           |
| 2.           | <i>Arabidopsis thaliana</i>    | AT3G61970       | AtNGA2           |
| 3.           | <i>Arabidopsis thaliana</i>    | AT1G01030       | AtNGA3           |
| 4.           | <i>Arabidopsis thaliana</i>    | AT4G01500       | AtNGA4           |
| 5.           | <i>Arabidopsis thaliana</i>    | AT2G36080       | AtNGA-Like1      |
| 6.           | <i>Arabidopsis thaliana</i>    | AT3G11580       | AtNGA-Like2      |
| 7.           | <i>Arabidopsis thaliana</i>    | AT5G06250       | AtNGA-Like3      |
| 8.           | <i>Brachypodium distachyon</i> | BRADI_1g77150v3 | BdNGA1           |
| 9.           | <i>Brachypodium distachyon</i> | BRADI_3g51840v3 | BdNGA2           |
| 10.          | <i>Brachypodium distachyon</i> | BRADI_5g19260v3 | BdNGA3           |
| 11.          | <i>Brachypodium distachyon</i> | BRADI_3g16500v3 | BdNGA4           |
| 12.          | <i>Brachypodium distachyon</i> | BRADI_3g32140v3 | BdNGA5           |
| 13.          | <i>Brachypodium distachyon</i> | BRADI_4g25170v3 | BdNGA-Like1-1    |
| 14.          | <i>Brachypodium distachyon</i> | BRADI_4g42167v3 | BdNGA-Like1-2    |
| 15.          | <i>Brassica rapa</i>           | Bra000434       | BrNGA1-1         |
| 16.          | <i>Brassica rapa</i>           | Bra040478       | BrNGA1-2         |
| 17.          | <i>Brassica rapa</i>           | Bra004501       | BrNGA1-3         |
| 18.          | <i>Brassica rapa</i>           | Bra003482       | BrNGA2-1         |
| 19.          | <i>Brassica rapa</i>           | Bra014415       | BrNGA2-2         |
| 20.          | <i>Brassica rapa</i>           | Bra007646       | BrNGA2-3         |
| 21.          | <i>Brassica rapa</i>           | Bra033294       | BrNGA3-1         |
| 22.          | <i>Brassica rapa</i>           | Bra030497       | BrNGA3-2         |
| 23.          | <i>Brassica rapa</i>           | Bra008552       | BrNGA4-1         |
| 24.          | <i>Brassica rapa</i>           | Bra037417       | BrNGA4-2         |
| 25.          | <i>Brassica rapa</i>           | Bra005301       | BrNGA-Like1-1    |
| 26.          | <i>Brassica rapa</i>           | Bra041023       | BrNGA-Like2-1    |
| 27.          | <i>Brassica rapa</i>           | Bra034828       | BrNGA-Like2-2    |
| 28.          | <i>Brassica rapa</i>           | Bra001411       | BrNGA-Like2-3    |
| 29.          | <i>Brassica rapa</i>           | Bra005886       | BrNGA-Like3-1    |
| 30.          | <i>Brassica rapa</i>           | Bra009171       | BrNGA-Like3-2    |
| 31.          | <i>Beta vulgaris</i>           | BVRB_5g104330   | BvNGA1           |
| 32.          | <i>Beta vulgaris</i>           | BVRB_7g158660   | BvNGA-Like1      |

|     |                           |                 |               |
|-----|---------------------------|-----------------|---------------|
| 33. | <i>Capsicum annum</i>     | CA01g34800      | CaNGA1        |
| 34. | <i>Capsicum annum</i>     | CA01g00060      | CaNGA3        |
| 35. | <i>Capsicum annum</i>     | CA10g17390      | CaNGA-Like1-1 |
| 36. | <i>Capsicum annum</i>     | CA09g00050      | CaNGA-Like1-2 |
| 37. | <i>Camelina sativa</i>    | Csa04g066000    | CsNGA1-1      |
| 38. | <i>Camelina sativa</i>    | Csa05g002280    | CsNGA1-2      |
| 39. | <i>Camelina sativa</i>    | Csa06g053390    | CsNGA1-3      |
| 40. | <i>Camelina sativa</i>    | Csa05g094180    | CsNGA2-1      |
| 41. | <i>Camelina sativa</i>    | Csa07g002630    | CsNGA2-2      |
| 42. | <i>Camelina sativa</i>    | Csa16g002690    | CsNGA2-3      |
| 43. | <i>Camelina sativa</i>    | Csa03g002200    | CsNGA3-1      |
| 44. | <i>Camelina sativa</i>    | Csa11g027850    | CsNGA3-2      |
| 45. | <i>Camelina sativa</i>    | Csa12g042130    | CsNGA3-3      |
| 46. | <i>Camelina sativa</i>    | Csa14g002160    | CsNGA3-4      |
| 47. | <i>Camelina sativa</i>    | Csa17g001510    | CsNGA3-5      |
| 48. | <i>Camelina sativa</i>    | Csa02g004620    | CsNGA4-1      |
| 49. | <i>Camelina sativa</i>    | Csa08g053000    | CsNGA4-2      |
| 50. | <i>Camelina sativa</i>    | Csa13g055780    | CsNGA4-3      |
| 51. | <i>Camelina sativa</i>    | Csa01g012670    | CsNGA-Like2-1 |
| 52. | <i>Camelina sativa</i>    | Csa15g015410    | CsNGA-Like2-2 |
| 53. | <i>Camelina sativa</i>    | Csa19g015730    | CsNGA-Like2-3 |
| 54. | <i>Camelina sativa</i>    | Csa08g058280    | CsNGA-Like3-1 |
| 55. | <i>Camelina sativa</i>    | Csa13g008230    | CsNGA-Like3-2 |
| 56. | <i>Camelina sativa</i>    | Csa20g008460    | CsNGA-Like3-3 |
| 57. | <i>Daucus carota</i>      | DCAR_006572     | DcNGA1        |
| 58. | <i>Daucus carota</i>      | DCAR_020732     | DcNGA-Like1-1 |
| 59. | <i>Daucus carota</i>      | DCAR_013418     | DcNGA-Like1-2 |
| 60. | <i>Eucalyptus grandis</i> | EUGRSUZ_L00348  | EgNGA1        |
| 61. | <i>Eucalyptus grandis</i> | EUGRSUZ_E01093  | EgNGA2        |
| 62. | <i>Eucalyptus grandis</i> | EUGRSUZ_A02625  | EgNGA-Like    |
| 63. | <i>Glycine max</i>        | GLYMA_19G261300 | GmNGA1-1      |
| 64. | <i>Glycine max</i>        | GLYMA_03G262200 | GmNGA1-2      |
| 65. | <i>Glycine max</i>        | GLYMA_16G017100 | GmNGA1-3      |
| 66. | <i>Glycine max</i>        | GLYMA_07G048200 | GmNGA1-4      |

|     |                            |                       |               |
|-----|----------------------------|-----------------------|---------------|
| 67. | <i>Glycine max</i>         | GLYMA_03G199000       | GmNGA-Like1-1 |
| 68. | <i>Glycine max</i>         | GLYMA_19G196600       | GmNGA-Like1-2 |
| 69. | <i>Glycine max</i>         | GLYMA_02G200500       | GmNGA-Like1-3 |
| 70. | <i>Glycine max</i>         | GLYMA_10G076100       | GmNGA-Like1-4 |
| 71. | <i>Gossypium raimondii</i> | B456_008G132400       | GrNGA1-1      |
| 72. | <i>Gossypium raimondii</i> | B456_001G150200       | GrNGA1-2      |
| 73. | <i>Gossypium raimondii</i> | B456_007G114200       | GrNGA1-3      |
| 74. | <i>Gossypium raimondii</i> | B456_004G128200       | GrNGA1-4      |
| 75. | <i>Gossypium raimondii</i> | B456_003G073600       | GrNGA1-5      |
| 76. | <i>Gossypium raimondii</i> | B456_008G261100       | GrNGA1-6      |
| 77. | <i>Gossypium raimondii</i> | B456_002G237900       | GrNGA-Like1-1 |
| 78. | <i>Gossypium raimondii</i> | B456_009G399000       | GrNGA-Like1-2 |
| 79. | <i>Gossypium raimondii</i> | B456_006G152400       | GrNGA-Like1-3 |
| 80. | <i>Helianthus annuus</i>   | HannXRQ Chr03g0083171 | HaNGA1-1      |
| 81. | <i>Helianthus annuus</i>   | HannXRQ Chr17g0534081 | HaNGA1-2      |
| 82. | <i>Helianthus annuus</i>   | HannXRQ Chr06g0167091 | HaNGA1-3      |
| 83. | <i>Helianthus annuus</i>   | HannXRQ Chr09g0238331 | HaNGA-Like    |
| 84. | <i>Hordeum vulgare</i>     | HORVU4Hr1G084950      | HvNGA1-1      |
| 85. | <i>Hordeum vulgare</i>     | HORVU7Hr1G046950      | HvNGA1-2      |
| 86. | <i>Hordeum vulgare</i>     | HORVU6Hr1G066190      | HvNGA2        |
| 87. | <i>Hordeum vulgare</i>     | HORVU7Hr1G002230      | HvNGA4-1      |
| 88. | <i>Hordeum vulgare</i>     | HORVU0Hr1G022200      | HvNGA4-2      |
| 89. | <i>Hordeum vulgare</i>     | HORVU5Hr1G040620      | HvNGA-Like    |
| 90. | <i>Musa acuminata</i>      | GSMUA_Achr4G26430_001 | MaNGA1-1      |
| 91. | <i>Musa acuminata</i>      | GSMUA_Achr4G30170_001 | MaNGA1-2      |
| 92. | <i>Musa acuminata</i>      | GSMUA_Achr5G12850_001 | MaNGA3-1      |
| 93. | <i>Musa acuminata</i>      | GSMUA_Achr2G00400_001 | MaNGA3-2      |
| 94. | <i>Musa acuminata</i>      | GSMUA_Achr1G03600_001 | MaNGA3-3      |
| 95. | <i>Musa acuminata</i>      | GSMUA_Achr5G20340_001 | MaNGA3-4      |
| 96. | <i>Musa acuminata</i>      | GSMUA_Achr5G10220_001 | MaNGA3-5      |

|             |                                    |                         |               |
|-------------|------------------------------------|-------------------------|---------------|
| <b>97.</b>  | <i>Musa acuminata</i>              | GSMUA_Achr5G10230_001   | MaNGA3-6      |
| <b>98.</b>  | <i>Musa acuminata</i>              | GSMUA_Achr4G24970_001   | MaNGA3-7      |
| <b>99.</b>  | <i>Musa acuminata</i>              | GSMUA_Achr7G04630_001   | MaNGA4-1      |
| <b>100.</b> | <i>Musa acuminata</i>              | GSMUA_Achr4G12210_001   | MaNGA4-2      |
| <b>101.</b> | <i>Musa acuminata</i>              | GSMUA_Achr6G35600_001   | MaNGA-Like1-1 |
| <b>102.</b> | <i>Musa acuminata</i>              | GSMUA_Achr6G18320_001   | MaNGA-Like1-2 |
| <b>103.</b> | <i>Musa acuminata</i>              | GSMUA_Achr3G19210_001   | MaNGA-Like1-3 |
| <b>104.</b> | <i>Musa acuminata</i>              | GSMUA_Achr6G13140_001   | MaNGA-Like1-4 |
| <b>105.</b> | <i>Musa acuminata</i>              | GSMUA_Achr9G08980_001   | MaNGA-Like1-5 |
| <b>106.</b> | <i>Musa acuminata</i>              | GSMUA_Achr9G02600_001   | MaNGA-Like1-6 |
| <b>107.</b> | <i>Manihot esculenta</i>           | MANES_05G015100         | MeNGA1-1      |
| <b>108.</b> | <i>Manihot esculenta</i>           | MANES_01G238800         | MeNGA1-2      |
| <b>109.</b> | <i>Manihot esculenta</i>           | MANES_01G001000         | MeNGA3        |
| <b>110.</b> | <i>Manihot esculenta</i>           | MANES_08G029200         | MeNGA-Like1-1 |
| <b>111.</b> | <i>Manihot esculenta</i>           | MANES_09G051400         | MeNGA-Like1-2 |
| <b>112.</b> | <i>Medicago truncatula</i>         | MTR_7g117455            | MtNGA1-1      |
| <b>113.</b> | <i>Medicago truncatula</i>         | MTR_8g023990            | MtNGA1-2      |
| <b>114.</b> | <i>Medicago truncatula</i>         | MTR_1g058350            | MtNGA-Like1-1 |
| <b>115.</b> | <i>Medicago truncatula</i>         | MTR_7g105370            | MtNGA-Like1-2 |
| <b>116.</b> | <i>Nicotiana tabacum</i>           | Nitab4.5_0000799g0050.1 | NtNGA1-1      |
| <b>117.</b> | <i>Nicotiana tabacum</i>           | Nitab4.5_0005519g0040.1 | NtNGA1-2      |
| <b>118.</b> | <i>Nicotiana tabacum</i>           | Nitab4.5_0015619g0010.1 | NtNGA3-1      |
| <b>119.</b> | <i>Nicotiana tabacum</i>           | Nitab4.5_0012411g0010.1 | NtNGA3-2      |
| <b>120.</b> | <i>Nicotiana tabacum</i>           | Nitab4.5_0000573g0030.1 | NtNGA-Like    |
| <b>121.</b> | <i>Oryza sativa Japonica group</i> | LOC_Os03g02900.1        | OsNGA1        |
| <b>122.</b> | <i>Oryza sativa Japonica group</i> | LOC_Os02g45850.1        | OsNGA2        |
| <b>123.</b> | <i>Oryza sativa Japonica group</i> | LOC_Os04g49230.1        | OsNGA3        |
| <b>124.</b> | <i>Oryza sativa Japonica group</i> | LOC_Os08g06120.1        | OsNGA4        |
| <b>125.</b> | <i>Oryza sativa Japonica group</i> | LOC_Os10g39190.1        | OsNGA5        |
| <b>126.</b> | <i>Oryza sativa Japonica group</i> | LOC_Os11g05740.1        | OsNGA-Like1-1 |
| <b>127.</b> | <i>Oryza sativa Japonica group</i> | LOC_Os12g06080.1        | OsNGA-Like1-2 |

|      |                             |                    |               |
|------|-----------------------------|--------------------|---------------|
| 128. | <i>Populus trichocarpa</i>  | POPTR_014G107200v3 | PtNGA1        |
| 129. | <i>Populus trichocarpa</i>  | POPTR_002G181600v3 | PtNGA2        |
| 130. | <i>Populus trichocarpa</i>  | POPTR_001G452200v3 | PtNGA3        |
| 131. | <i>Populus trichocarpa</i>  | POPTR_011G149700v3 | ptNGA4        |
| 132. | <i>Populus trichocarpa</i>  | POPTR_006G208100v3 | PtNGA-Like1-1 |
| 133. | <i>Populus trichocarpa</i>  | POPTR_016G074500v3 | PtNGA-Like1-2 |
| 134. | <i>Phaseolus vulgaris</i>   | PHAVU_010G120900g  | PvNGA1-1      |
| 135. | <i>Phaseolus vulgaris</i>   | PHAVU_009G260100g  | PvNGA1-2      |
| 136. | <i>Phaseolus vulgaris</i>   | PHAVU_007G230700g  | PvNGA-Like1-1 |
| 137. | <i>Phaseolus vulgaris</i>   | PHAVU_001G193100g  | PvNGA-Like1-2 |
| 138. | <i>Sorghum bicolor</i>      | SORBI_3001G528200  | SbNGA1        |
| 139. | <i>Sorghum bicolor</i>      | SORBI_3004G280500  | SbNGA2        |
| 140. | <i>Sorghum bicolor</i>      | SORBI_3006G190400  | SbNGA3        |
| 141. | <i>Sorghum bicolor</i>      | SORBI_3007G047500  | SbNGA4        |
| 142. | <i>Sorghum bicolor</i>      | SORBI_3001G313800  | SbNGA5        |
| 143. | <i>Sorghum bicolor</i>      | SORBI_3005G041400  | SbNGA-Like1-1 |
| 144. | <i>Sorghum bicolor</i>      | SORBI_3008G041100  | SbNGA-Like1-2 |
| 145. | <i>Setaria italica</i>      | SETIT 036864mg     | SiNGA1        |
| 146. | <i>Setaria italica</i>      | SETIT 020241mg     | SiNGA2        |
| 147. | <i>Setaria italica</i>      | SETIT 011823mg     | SiNGA3        |
| 148. | <i>Setaria italica</i>      | SETIT 014362mg     | SiNGA4-1      |
| 149. | <i>Setaria italica</i>      | SETIT 008509mg     | SiNGA4-2      |
| 150. | <i>Setaria italica</i>      | SETIT 039972mg     | SiNGA5        |
| 151. | <i>Setaria italica</i>      | SETIT 027632mg     | SiNGA-Like1-1 |
| 152. | <i>Setaria italica</i>      | SETIT 010849mg     | SiNGA-Like1-2 |
| 153. | <i>Solanum lycopersicum</i> | Solyc08g013700.1.1 | SINGA1        |
| 154. | <i>Solanum lycopersicum</i> | Solyc08g013690.1.1 | SINGA2        |
| 155. | <i>Solanum lycopersicum</i> | Solyc05g004000.1.1 | SINGA3        |
| 156. | <i>Solanum lycopersicum</i> | Solyc10g083210.2.1 | SINGA-Like1-1 |

|             |                             |                      |               |
|-------------|-----------------------------|----------------------|---------------|
| <b>157.</b> | <i>Solanum lycopersicum</i> | Solyc09g010230.2.1   | SINGA-Like1-3 |
| <b>158.</b> | <i>Solanum tuberosum</i>    | PGSC0003DMP400010383 | StNGA1        |
| <b>159.</b> | <i>Solanum tuberosum</i>    | PGSC0003DMP400010384 | StNGA2        |
| <b>160.</b> | <i>Solanum tuberosum</i>    | PGSC0003DMP400021619 | StNGA3        |
| <b>161.</b> | <i>Solanum tuberosum</i>    | PGSC0003DMP400048918 | StNGA-Like1-1 |
| <b>162.</b> | <i>Solanum tuberosum</i>    | PGSC0003DMP400048917 | StNGA-Like1-2 |
| <b>163.</b> | <i>Solanum tuberosum</i>    | PGSC0003DMP400015721 | StNGA-Like1-3 |
| <b>164.</b> | <i>Solanum tuberosum</i>    | PGSC0003DMP400015722 | StNGA-Like1-4 |
| <b>165.</b> | <i>Triticum aestivum</i>    | TraesCS4B02G348500   | TaNGA1-1      |
| <b>166.</b> | <i>Triticum aestivum</i>    | TraesCS5A02G516600   | TaNGA1-2      |
| <b>167.</b> | <i>Triticum aestivum</i>    | TraesCS6B02G286900   | TaNGA2-1      |
| <b>168.</b> | <i>Triticum aestivum</i>    | TraesCS6A02G259600   | TaNGA2-2      |
| <b>169.</b> | <i>Triticum aestivum</i>    | TraesCS6D02G240600   | TaNGA2-3      |
| <b>170.</b> | <i>Triticum aestivum</i>    | TraesCS2A02G394700   | TaNGA3-1      |
| <b>171.</b> | <i>Triticum aestivum</i>    | TraesCS2D02G392400   | TaNGA3-2      |
| <b>172.</b> | <i>Triticum aestivum</i>    | TraesCS2B02G412700   | TaNGA3-3      |
| <b>173.</b> | <i>Triticum aestivum</i>    | TraesCS7D02G448900   | TaNGA4-1      |
| <b>174.</b> | <i>Triticum aestivum</i>    | TraesCS7A02G461000   | TaNGA4-2      |
| <b>175.</b> | <i>Triticum aestivum</i>    | TraesCS7B02G362500   | TaNGA4-3      |
| <b>176.</b> | <i>Triticum aestivum</i>    | TraesCS7A02G020800   | TaNGA4-4      |
| <b>177.</b> | <i>Triticum aestivum</i>    | TraesCS7A02G020700   | TaNGA4-5      |
| <b>178.</b> | <i>Triticum aestivum</i>    | TraesCS7D02G017000   | TaNGA4-6      |
| <b>179.</b> | <i>Triticum aestivum</i>    | TraesCS4A02G472700   | TaNGA4-7      |
| <b>180.</b> | <i>Triticum aestivum</i>    | TraesCS1A02G200500   | TaNGA5-1      |
| <b>181.</b> | <i>Triticum aestivum</i>    | TraesCS1B02G215000   | TaNGA5-2      |
| <b>182.</b> | <i>Triticum aestivum</i>    | TraesCS1D02G203900   | TaNGA5-3      |
| <b>183.</b> | <i>Triticum aestivum</i>    | TraesCS4D02G114900   | TaNGA-Like1-1 |
| <b>184.</b> | <i>Triticum aestivum</i>    | TraesCS4B02G117100   | TaNGA-Like1-2 |
| <b>185.</b> | <i>Triticum aestivum</i>    | TraesCS4A02G198300   | TaNGA-Like1-3 |

|             |                          |                    |               |
|-------------|--------------------------|--------------------|---------------|
| <b>186.</b> | <i>Triticum aestivum</i> | TraesCS5B02G126200 | TaNGA-Like1-4 |
| <b>187.</b> | <i>Triticum aestivum</i> | TraesCS5A02G127100 | TaNGA-Like1-5 |
| <b>188.</b> | <i>Triticum aestivum</i> | TraesCS2A02G460700 | TaNGA-Like1-6 |
| <b>189.</b> | <i>Triticum aestivum</i> | TraesCS2D02G460900 | TaNGA-Like1-7 |
| <b>190.</b> | <i>Triticum aestivum</i> | TraesCS2B02G482400 | TaNGA-Like1-8 |
| <b>191.</b> | <i>Vitis vinifera</i>    | GSVIVT01027463001  | VvNGA1        |
| <b>192.</b> | <i>Vitis vinifera</i>    | GSVIVT01019699001  | VvNGA3        |
| <b>193.</b> | <i>Vitis vinifera</i>    | GSVIVT01033902001  | VvNGA-Like    |
| <b>194.</b> | <i>Zea mays</i>          | Zm00001d027409     | ZmNGA1-1      |
| <b>195.</b> | <i>Zea mays</i>          | Zm00001d010077     | ZmNGA1-2      |
| <b>196.</b> | <i>Zea mays</i>          | Zm00001d048815     | ZmNGA1-3      |
| <b>197.</b> | <i>Zea mays</i>          | Zm00001d017618     | ZmNGA2-1      |
| <b>198.</b> | <i>Zea mays</i>          | Zm00001d051471     | ZmNGA2-2      |
| <b>199.</b> | <i>Zea mays</i>          | Zm00001d026005     | ZmNGA3-1      |
| <b>200.</b> | <i>Zea mays</i>          | Zm00001d002562     | ZmNGA3-2      |
| <b>201.</b> | <i>Zea mays</i>          | Zm00001d024545     | ZmNGA4-1      |
| <b>202.</b> | <i>Zea mays</i>          | Zm00001d024103     | ZmNGA4-2      |
| <b>203.</b> | <i>Zea mays</i>          | Zm00001d035903     | ZmNGA4-3      |
| <b>204.</b> | <i>Zea mays</i>          | Zm00001d047359     | ZmNGA5-1      |
| <b>205.</b> | <i>Zea mays</i>          | Zm00001d029749     | ZmNGA5-2      |
| <b>206.</b> | <i>Zea mays</i>          | Zm00001d052591     | ZmNGA-Like1-1 |
| <b>207.</b> | <i>Zea mays</i>          | Zm00001d023446     | ZmNGA-Like1-2 |

**Table S2.** The similarity matrix of NGA proteins of *A. thaliana*, *S. lycopersicum* and *O.sativa* L. Japonica

|               |        |        |        |        |        |        |        |        |        |        |        |        |             |             |             |               |               |               |               |
|---------------|--------|--------|--------|--------|--------|--------|--------|--------|--------|--------|--------|--------|-------------|-------------|-------------|---------------|---------------|---------------|---------------|
| AtNGA1        | 100%   |        |        |        |        |        |        |        |        |        |        |        |             |             |             |               |               |               |               |
| AtNGA2        | 68.22% | 100%   |        |        |        |        |        |        |        |        |        |        |             |             |             |               |               |               |               |
| AtNGA3        | 54.51% | 52.17% | 100%   |        |        |        |        |        |        |        |        |        |             |             |             |               |               |               |               |
| AtNGA4        | 47.41% | 46.15% | 52.25% | 100%   |        |        |        |        |        |        |        |        |             |             |             |               |               |               |               |
| SINGA1        | 48.97% | 45.57% | 51.36% | 44.21% | 100%   |        |        |        |        |        |        |        |             |             |             |               |               |               |               |
| SINGA2        | 49.03% | 47.49% | 50.3%  | 43.2%  | 80.95% | 100%   |        |        |        |        |        |        |             |             |             |               |               |               |               |
| SINGA3        | 57.41% | 53.17% | 44.69% | 43.24% | 60.88% | 58.95% | 100%   |        |        |        |        |        |             |             |             |               |               |               |               |
| OsNGA1        | 45.8%  | 47.15% | 49.19% | 45.33% | 47.95% | 46.62% | 47.9%  | 100%   |        |        |        |        |             |             |             |               |               |               |               |
| OsNGA2        | 46.12% | 45.15% | 42.17% | 40.54% | 48.63% | 48.14% | 43.12% | 57.87% | 100%   |        |        |        |             |             |             |               |               |               |               |
| OsNGA3        | 37.41% | 38.12% | 39.24% | 34.17% | 42.17% | 38.92% | 42.08% | 45.98% | 62.97% | 100%   |        |        |             |             |             |               |               |               |               |
| OsNGA4        | 41.81% | 38.67% | 42.5%  | 38.67% | 39.37% | 40.76% | 38.32% | 46.68% | 47.73% | 39.02% | 100%   |        |             |             |             |               |               |               |               |
| OsNGA5        | 42.9%  | 44.81% | 44.55% | 42.3%  | 44.55% | 45.19% | 44.87% | 60.77% | 53.2%  | 43.26% | 42.5%  | 100%   |             |             |             |               |               |               |               |
| AtNGA-Like1   | 47.95% | 43.03% | 47.54% | 42.21% | 43.85% | 47.54% | 47.13% | 44.67% | 47.54% | 40.98% | 44.67% | 43.85% | 100%        |             |             |               |               |               |               |
| AtNGA-Like2   | 45.31% | 41.57% | 44.94% | 39.7%  | 43.07% | 42.69% | 40.82% | 45.31% | 42.32% | 38.95% | 38.57% | 44.19% | 57.37%      | 100%        |             |               |               |               |               |
| AtNGA-Like3   | 40.07% | 37.23% | 42.9%  | 39.36% | 39.36% | 40.78% | 41.13% | 41.84% | 42.55% | 37.94% | 36.17% | 41.84% | 59.83%      | 62.54%      | 100%        |               |               |               |               |
| SINGA-like1-1 | 36.12% | 36.12% | 39.87% | 35.12% | 38.77% | 37.97% | 39.24% | 35.69% | 39.24% | 35.12% | 36.58% | 34.93% | 61.06%      | 52.43%      | 51.41%      | 100%          |               |               |               |
| SINGA-like1-3 | 42.25% | 40.8%  | 37.97% | 36.93% | 40.81% | 39.19% | 36.52% | 40.19% | 37.1%  | 36.7%  | 38.32% | 39.42% | 61.88%      | 54.68%      | 53.9%       | 67.72%        | 100%          |               |               |
| OsNGA-Like1-1 | 39.78% | 39.42% | 40.86% | 37.63% | 39.06% | 43.36% | 43.72% | 46.95% | 43.72% | 37.63% | 37.63% | 43.01% | 49.18%      | 43.82%      | 42.29%      | 43.36%        | 45.16%        | 100%          |               |
| OsNGA-Like1-2 | 40.79% | 40.43% | 41.51% | 37.9%  | 38.98% | 41.15% | 42.59% | 46.93% | 42.59% | 38.62% | 36.46% | 41.87% | 50%         | 46.44%      | 44.76%      | 45.12%        | 47.29%        | 79.06%        | 100%          |
|               | AtNGA1 | AtNGA2 | AtNGA3 | AtNGA4 | SINGA1 | SINGA2 | SINGA3 | OsNGA1 | OsNGA2 | OsNGA3 | OsNGA4 | OsNGA5 | AtNGA-Like1 | AtNGA-Like2 | AtNGA-Like3 | SINGA-like1-1 | SINGA-like1-3 | OsNGA-Like1-1 | OsNGA-Like1-2 |



**Table S3.** List of primers used for qPCR.

| <b>Gene name</b>     | <b>Forward primer (5'→3')</b> | <b>Reverse primer (5'→3')</b> |
|----------------------|-------------------------------|-------------------------------|
| <i>AtNGA1</i>        | TTGATATGGAATGCGGCGAGAGC       | GCAAACCTCCACCGGAAGATGATG      |
| <i>AtNGA2</i>        | TCAGCAATTCGCCGGAGCTATG        | TTGTCGGCATCTGAGGATGAGG        |
| <i>AtNGA3</i>        | ACGGCAAGATGTGGAGATTCCG        | CGGCTCCATCCTTTGGTCATAACG      |
| <i>AtNGA4</i>        | AGAAACTCTTCGCCGGAGACAC        | TCCGGTTGTGCGTTATCGTCAG        |
| <i>AtNGA-LIKE 1</i>  | ATCCTCCTCCGTACTACATGGAC       | TCTAGCTCGTCCGGTTCATATCTC      |
| <i>AtNGA-LIKE 2</i>  | GCTGTCTCCGTTGTGTCTCAAG        | TAGTCAAGCCGCTCCAATACGC        |
| <i>AtNGA-LIKE 3</i>  | CGCCGTGAATACGAGTTCTATGGG      | GGCTCTAGTGGCGTGGATTTGATG      |
| <i>SINGA1</i>        | AAACTTGATGCTGGTGATGTTG        | AGTCAATGAAGAGACGGTGC          |
| <i>SINGA2</i>        | CGGAGAAGTATTTCCCTCTTG         | CCATGGCTTCCCATTACTATC         |
| <i>SINGA3</i>        | TGTCTCATTTTCAGCGTGGAG         | CTGGGTACTGAATATTAGAGCGG       |
| <i>SINGA-LIKE1-1</i> | CTCCGAAGCAAAACAGCAATC         | CAACATCACTCGGCGTTAATG         |
| <i>SINGA-LIKE1-3</i> | AAATATTGGCGGAGGTGGAG          | GACAGTCAGGTTGGTATGGAAG        |
| <i>ACTIN</i>         | TGTCCCTATTTACGAGGGTTATGC      | AGTTAAATCACGACCAGCAAGAT       |
| <i>UBIQUITIN</i>     | GCCGACTACAACATCCAGAAGG        | TGCAACACAGCGAGCTTAACC         |
| <i>RNaseH</i>        | ACTCTCGAAGCTCCACAAGGAAG       | AAGCCACTTCAACTTCTCCTTCAG      |
